# Supplementary material for: Chiral defect-induced blue photoluminescence and circularly polarized luminescence of zero-dimensional Cs4PbBr6 perovskite nanocrystals
Source: Royal Society of Chemistry journal article supplement (doi:10.1039/d4qi01006j), 2024-01-01
Supplement: d4qi01006j1.pdf [file d4qi01006j1.pdf]

## Supporting Information

### Chiral defect induced blue photoluminescence and circular polarization luminescence of zero-dimensional Cs<sub>4</sub>PbBr<sub>6</sub> perovskite nanocrystals

*Jiaqi Zhao<sup>1</sup>, Yuan Wang<sup>1</sup>, Tinglei Wang<sup>1</sup> and Yu Wang<sup>1\*</sup>*

<sup>1</sup> State Key Laboratory of Inorganic Synthesis and Preparative Chemistry, College of Chemistry, Jilin University, 2699 Qianjin Street, Changchun 130012

\*Corresponding Authors: wangyu@jlu.edu.cn.

## Table of Contents

|       |                                                                                                              |    |
|-------|--------------------------------------------------------------------------------------------------------------|----|
| 1.    | Schematic illustrations of the crystal structures .....                                                      | 3  |
| 2.    | TEM and HRTEM images of CsPbBr <sub>3</sub> NCs .....                                                        | 3  |
| 3.    | XRD patterns of CsPbBr <sub>3</sub> NCs .....                                                                | 4  |
| 4.    | UV-vis spectra and PL spectra of CsPbBr <sub>3</sub> NCs .....                                               | 4  |
| 5.    | Particle size distribution of <i>R</i> -, <i>S</i> -Cs <sub>4</sub> PbBr <sub>6</sub> NCs .....              | 5  |
| 6.    | HRTEM image and selected-area FFT patterns .....                                                             | 5  |
| 7.    | TEM and HRTEM images of N-Cs <sub>4</sub> PbBr <sub>6</sub> NCs .....                                        | 6  |
| 8.    | Photographs of CsPbBr <sub>3</sub> NCs .....                                                                 | 7  |
| 9.    | UV-vis and PL spectra of N-Cs <sub>4</sub> PbBr <sub>6</sub> NCs .....                                       | 8  |
| 10.   | Photographs of N-Cs <sub>4</sub> PbBr <sub>6</sub> NCs .....                                                 | 8  |
| 11.   | PL decay lifetime of <i>R</i> -, <i>S</i> -Cs <sub>4</sub> PbBr <sub>6</sub> NCs. ....                       | 9  |
| 12.   | Optical band gap .....                                                                                       | 10 |
| 13.   | CD spectra .....                                                                                             | 11 |
| 13.1. | CD spectra of <i>R</i> -, <i>S</i> -MBA .....                                                                | 11 |
| 13.2. | CD spectra of CsPbBr <sub>3</sub> and N-Cs <sub>4</sub> PbBr <sub>6</sub> NCs .....                          | 11 |
| 13.3. | CD and $g_{abs}$ spectra of CsPbBr <sub>3</sub> NCs with different content of chiral precursors solution     | 12 |
| 13.4. | DC (V) plots of <i>R</i> -, <i>S</i> -Cs <sub>4</sub> PbBr <sub>6</sub> NCs .....                            | 12 |
| 14.   | TEM images of CsPbBr <sub>3</sub> NCs with different content of chiral precursors solution. ....             | 13 |
| 15.   | PL and UV-vis spectra of CsPbBr <sub>3</sub> NCs with different content of chiral precursors solution.<br>14 |    |
| 16.   | XRD patterns of CsPbBr <sub>3</sub> NCs with different content of chiral precursors solution .....           | 15 |
| 17.   | FTIR Characterization .....                                                                                  | 16 |
| 19.   | NMR spectra .....                                                                                            | 18 |
| 20.   | TRPL Data .....                                                                                              | 19 |
| 21.   | The absorption dissymmetry factor ( $g_{abs}$ ) .....                                                        | 20 |

## 1. Schematic illustrations of the crystal structures

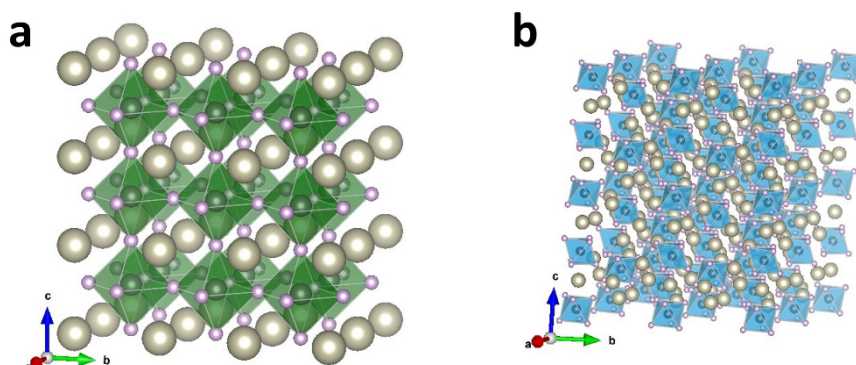

**Fig. S1.** Schematic illustrations of the crystal structures of (a) three-dimensional (3-D) cubic phase CsPbBr<sub>3</sub> and (b) zero-dimensional (0-D) rhombohedral phase Cs<sub>4</sub>PbBr<sub>6</sub>.

## 2. TEM and HRTEM images of CsPbBr<sub>3</sub> NCs

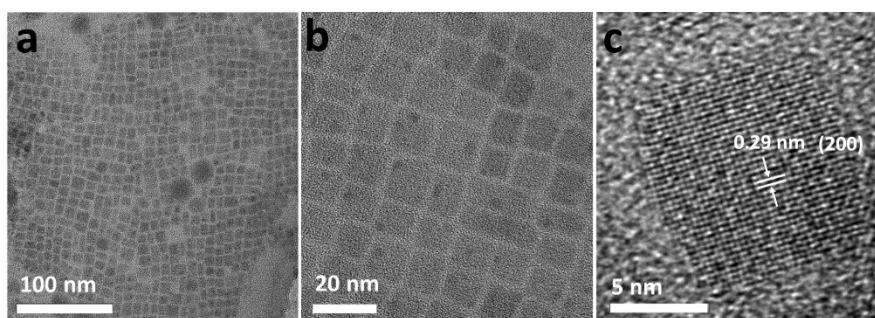

**Fig. S2.** TEM images of (a, b) CsPbBr<sub>3</sub> NCs with different magnifications. HRTEM images of CsPbBr<sub>3</sub> NCs.

### 3. XRD patterns of CsPbBr<sub>3</sub> NCs

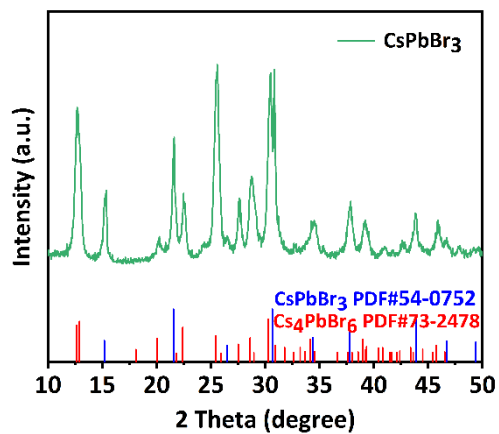

Fig. S3. XRD patterns of CsPbBr<sub>3</sub> NCs.

### 4. UV-vis spectra and PL spectra of CsPbBr<sub>3</sub> NCs

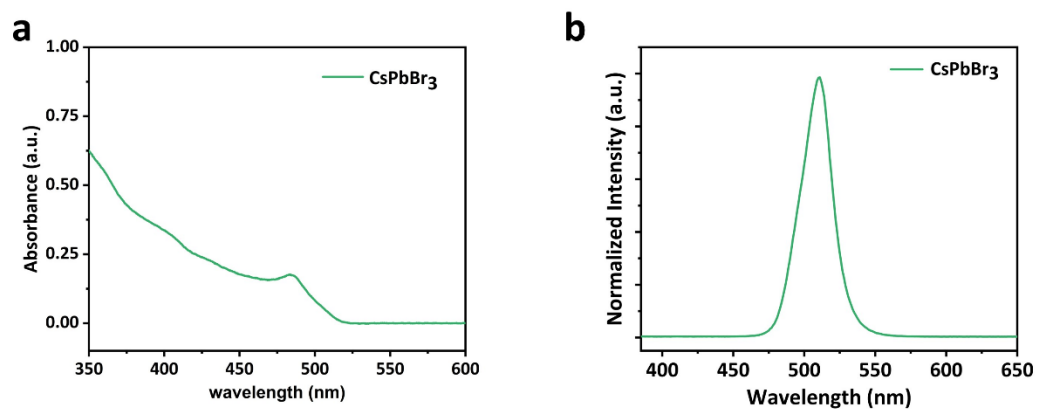

Fig. S4. (a) UV-vis spectra and (b) PL spectra of CsPbBr<sub>3</sub> NCs.

## 5. Particle size distribution of *R*-, *S*-Cs<sub>4</sub>PbBr<sub>6</sub> NCs

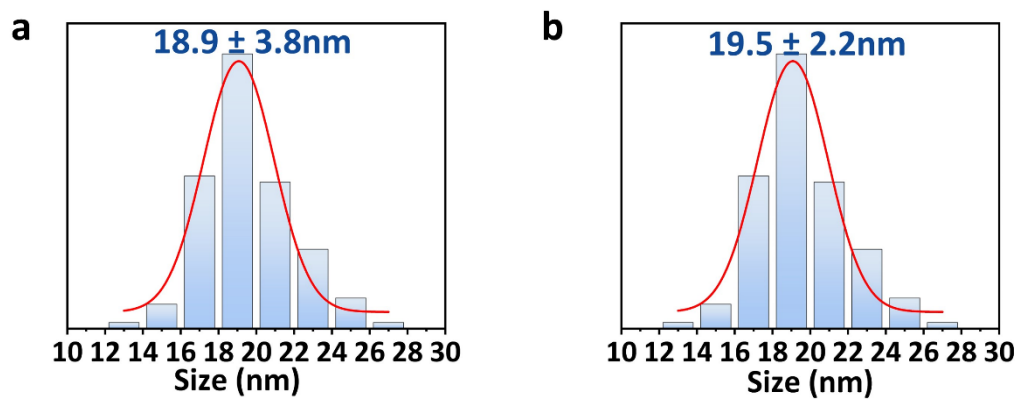

Fig. S5. Particle size distribution of *R*-, *S*-Cs<sub>4</sub>PbBr<sub>6</sub> NCs.

## 6. HRTEM image and selected-area FFT patterns

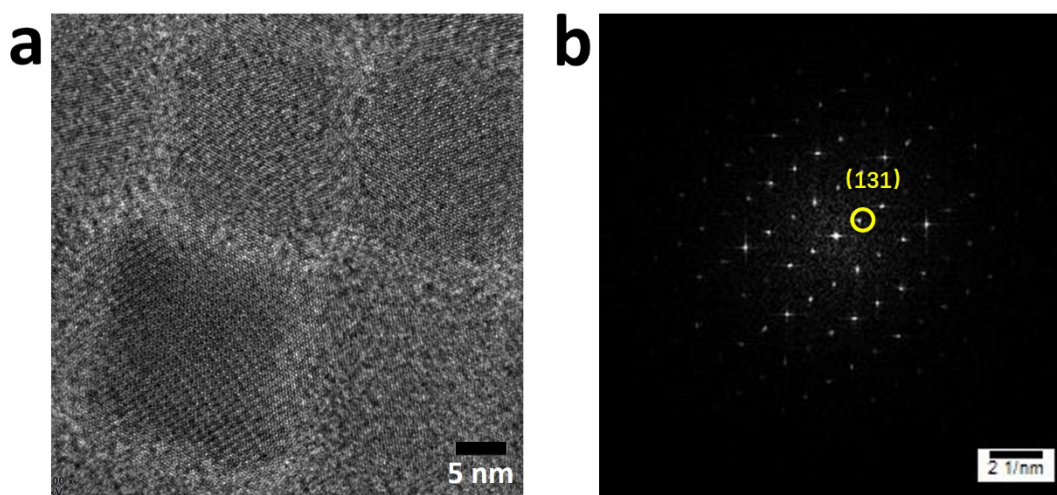

Fig. S6. HRTEM image of a) *R*-Cs<sub>4</sub>PbBr<sub>6</sub> NCs and b) the corresponding selected-area FFT patterns.

## 7. TEM and HRTEM images of N-Cs<sub>4</sub>PbBr<sub>6</sub> NCs

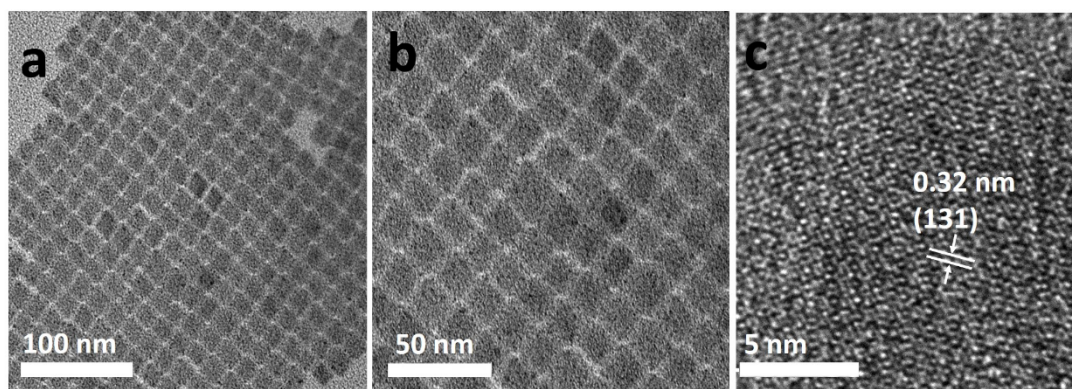

**Fig. S7.** TEM images of (a, b) N-Cs<sub>4</sub>PbBr<sub>6</sub> NCs with different magnifications. HRTEM image of N-Cs<sub>4</sub>PbBr<sub>6</sub> NCs.

## 8. Photographs of CsPbBr<sub>3</sub> NCs

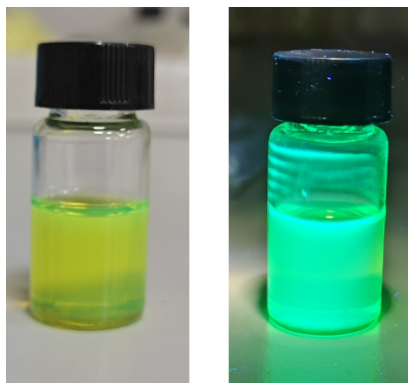

**Fig. S8.** Photographs of CsPbBr<sub>3</sub> NCs under visible illumination (left) and UV 365 nm illumination (right).

## 9. UV-vis and PL spectra of N-Cs<sub>4</sub>PbBr<sub>6</sub> NCs

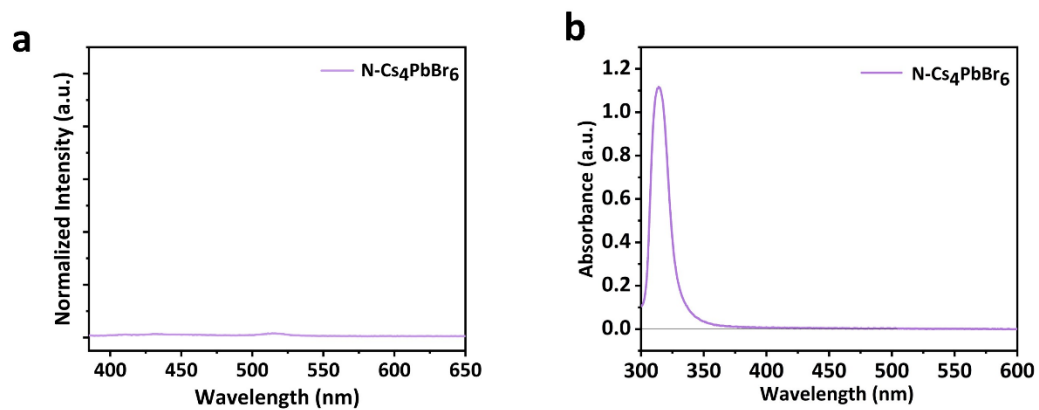

Fig. S9. (a) PL spectrum and (b) UV-vis spectrum of N-Cs<sub>4</sub>PbBr<sub>6</sub> NCs.

## 10. Photographs of N-Cs<sub>4</sub>PbBr<sub>6</sub> NCs

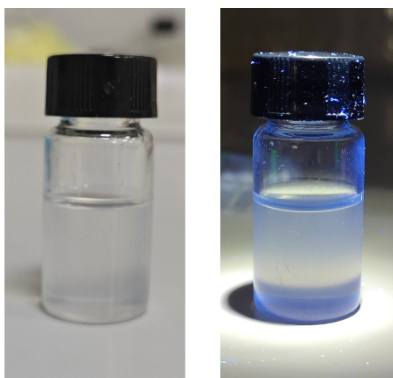

Fig. S10. Photographs of N-Cs<sub>4</sub>PbBr<sub>6</sub> NCs under visible illumination (left) and UV 365 nm illumination (right).



### 11. PL decay lifetime of *R*-, *S*-Cs<sub>4</sub>PbBr<sub>6</sub> NCs.

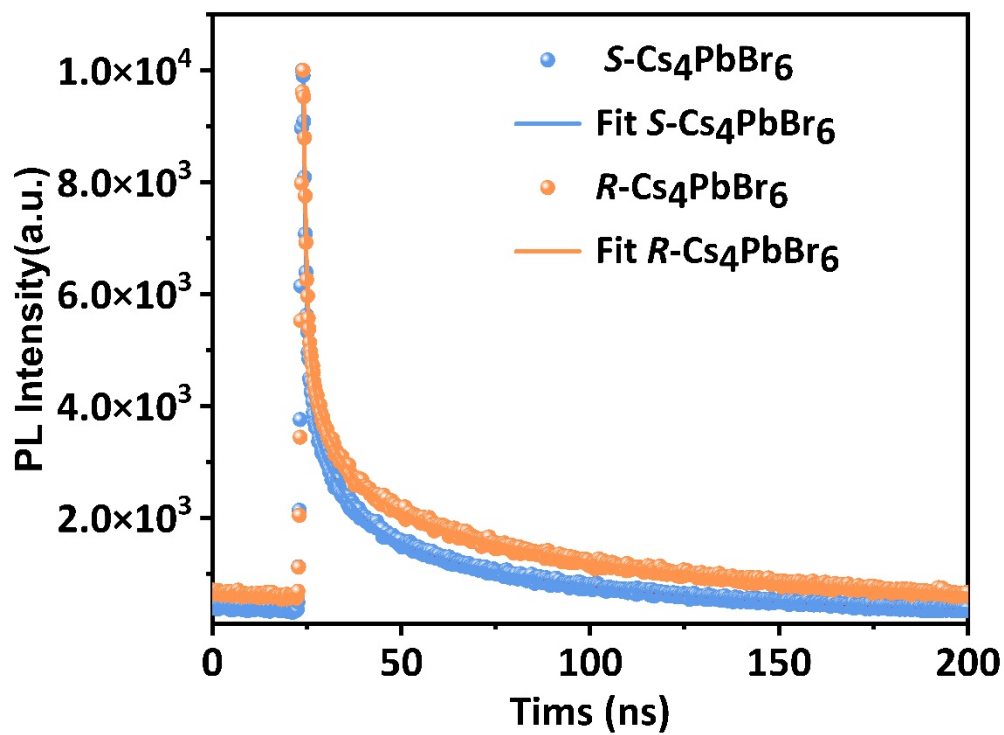

Fig. S11. PL decay lifetime of *R*-, *S*-Cs<sub>4</sub>PbBr<sub>6</sub> NCs.

## 12. Optical band gap

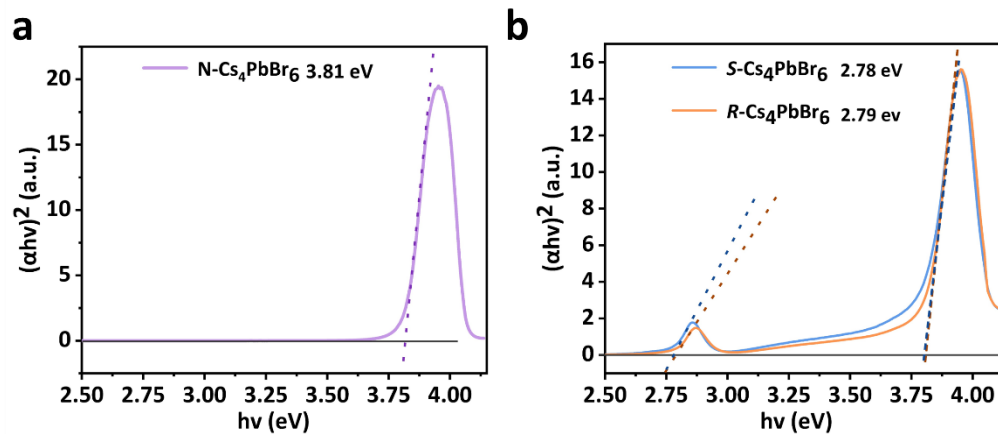

**Fig. S12.** Optical band gap of (a) N-Cs<sub>4</sub>PbBr<sub>6</sub> NCs and (b) R-, S-Cs<sub>4</sub>PbBr<sub>6</sub> NCs.

## 13. CD spectra

### 13.1. CD spectra of *R*-, *S*-MBA

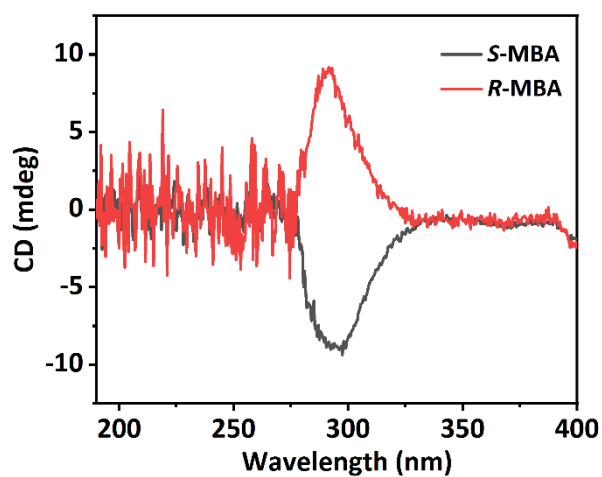

Fig. S13. CD spectra of *R*-, *S*-MBA in toluene solution.

### 13.2. CD spectra of CsPbBr<sub>3</sub> and N-Cs<sub>4</sub>PbBr<sub>6</sub>NCs

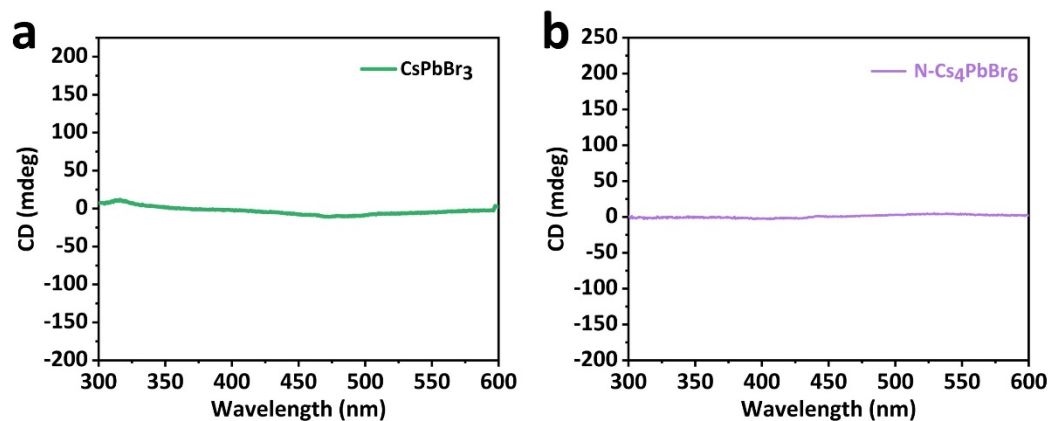

Fig. S14. CD spectra of (a) CsPbBr<sub>3</sub> and (b) N-Cs<sub>4</sub>PbBr<sub>6</sub> NCs.

### 13.3. CD and $g_{\text{abs}}$ spectra of CsPbBr<sub>3</sub> NCs with different content of chiral precursors solution

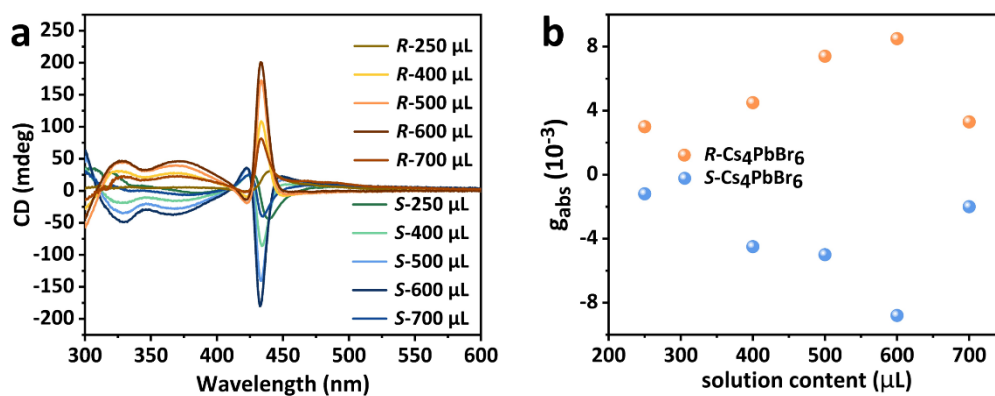

Fig. S15. CD spectra of CsPbBr<sub>3</sub> NCs with different content of chiral precursors solution and corresponding  $g_{\text{abs}}$  values.

### 13.4. DC (V) plots of R-, S-Cs<sub>4</sub>PbBr<sub>6</sub> NCs

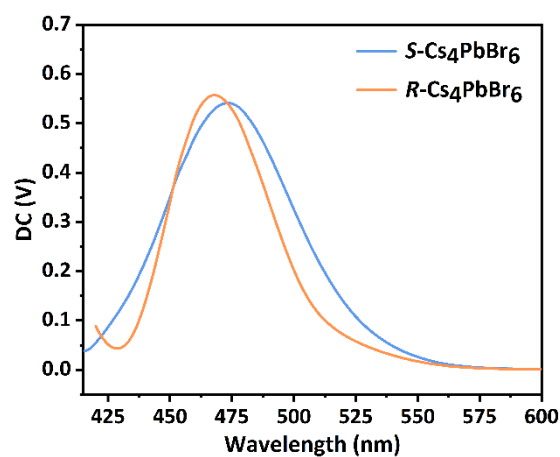

Fig. S16. DC (V) plots of R-, S-Cs<sub>4</sub>PbBr<sub>6</sub> NCs.

14. TEM images of CsPbBr<sub>3</sub> NCs with different content of chiral precursors solution.

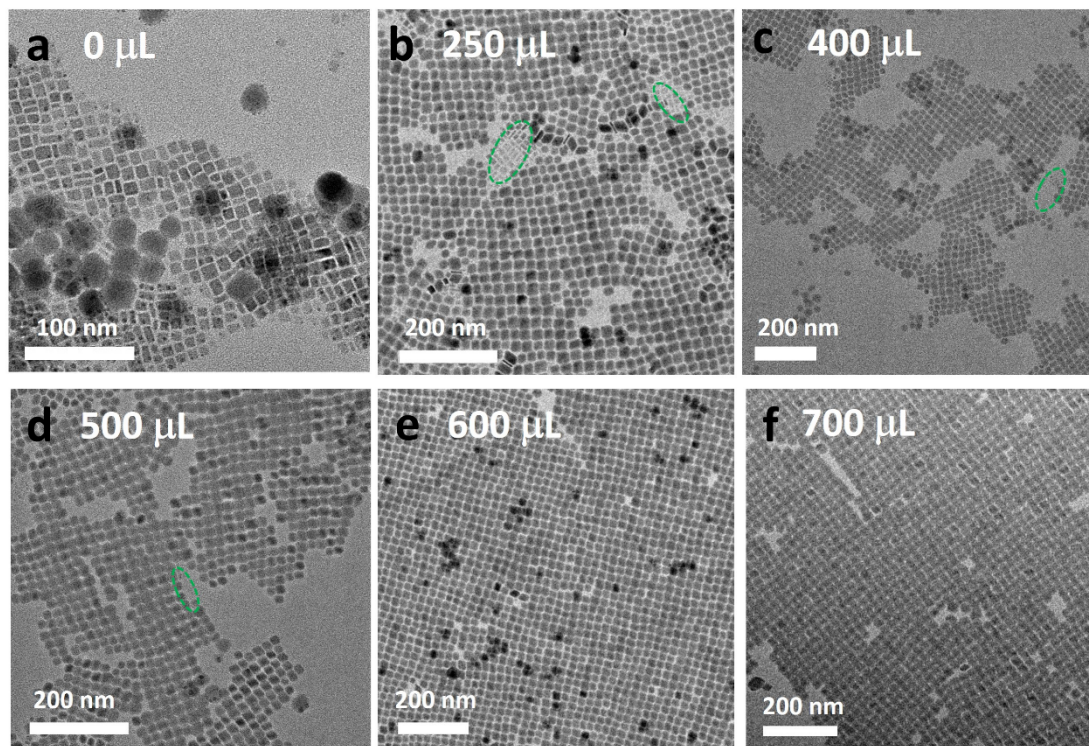

**Fig. S17.** TEM images of CsPbBr<sub>3</sub> NCs with different content of chiral precursors solution. The green area circled is cubic CsPbBr<sub>3</sub> NCs without phase transformation.

15. PL and UV-vis spectra of CsPbBr<sub>3</sub> NCs with different content of chiral precursors solution.

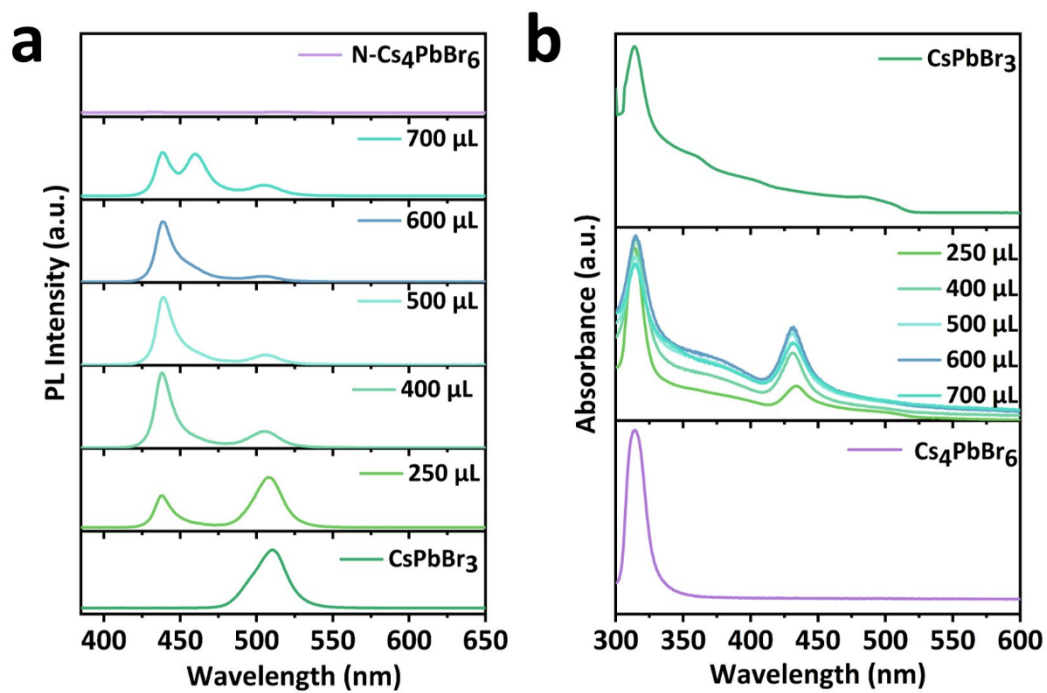

Fig. S18. The (a) PL spectra and (b) UV-vis spectra of CsPbBr<sub>3</sub> NCs with different content of chiral precursors solution.

16.XRD patterns of CsPbBr<sub>3</sub> NCs with different content of chiral precursors solution.

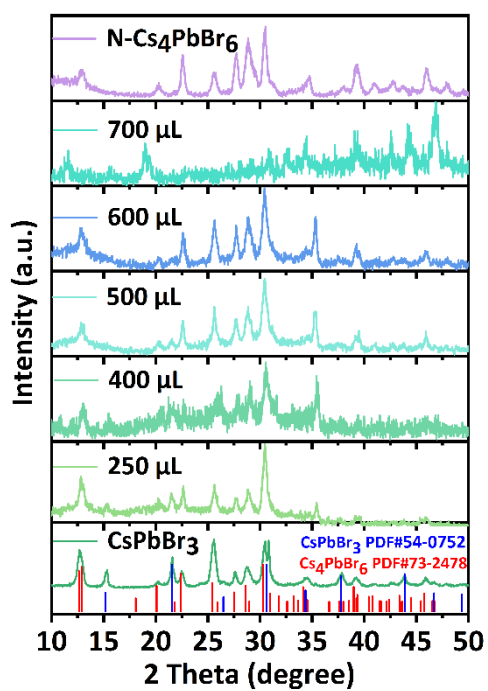

Fig. S19. XRD patterns of CsPbBr<sub>3</sub> NCs with different content of chiral precursors solution.

## 17. FTIR Characterization

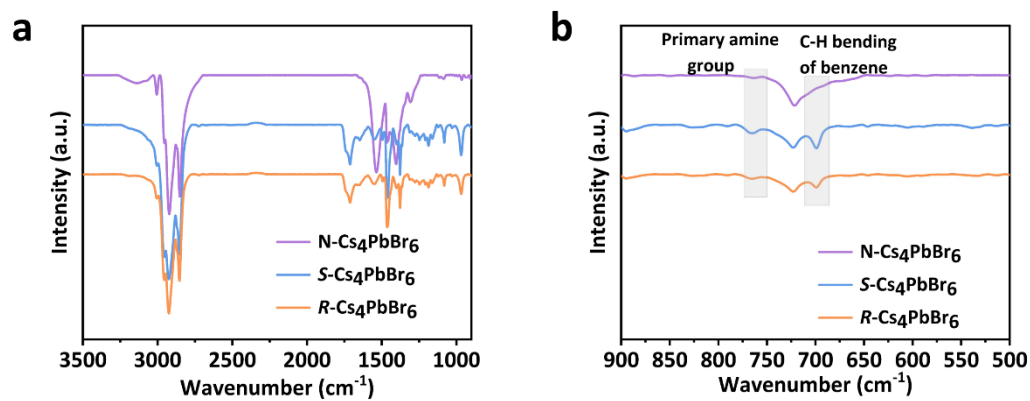

**Fig. S20.** The FTIR spectra of N- $\text{Cs}_4\text{PbBr}_6$ , R-, S- $\text{Cs}_4\text{PbBr}_6$  NCs at different wavenumber regions.



## 18.XPS Analysis

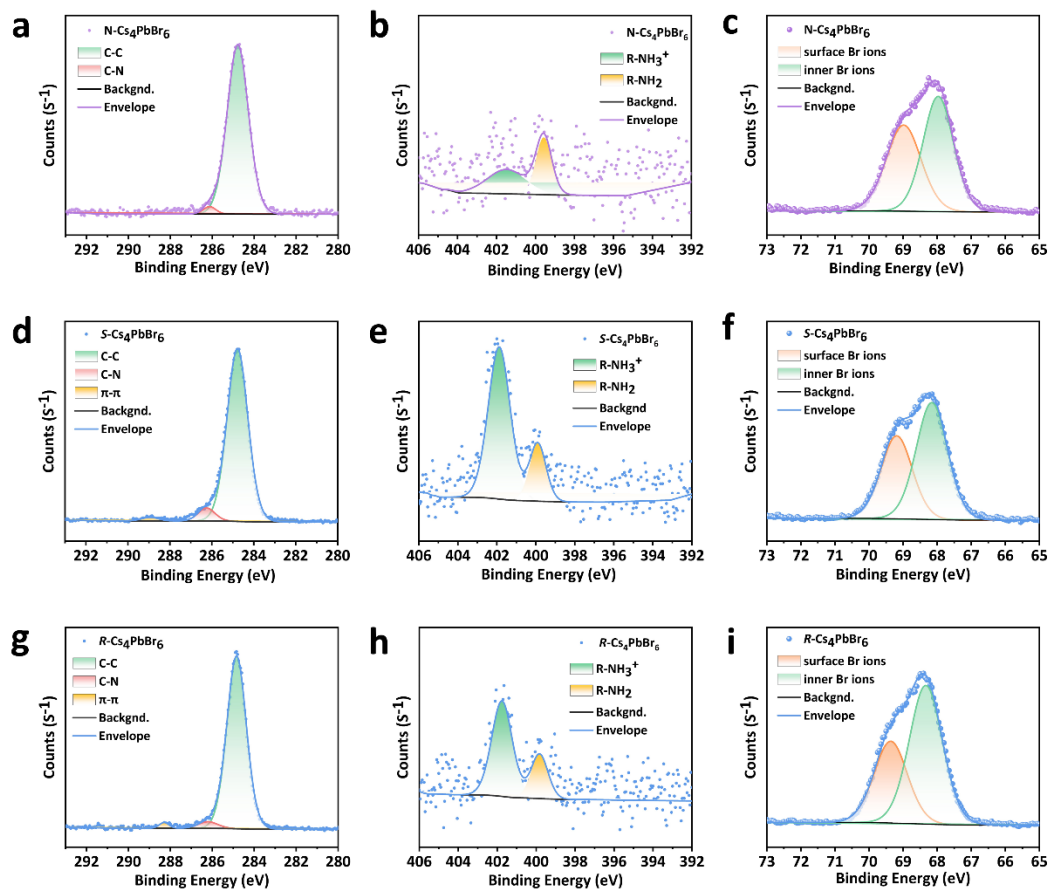

**Fig. S21.** XPS spectra of (a-c) N 1s, C 1s and Br of  $\text{CsPbBr}_3$  NCs, (d-f) N 1s, C 1s and Br of  $\text{S-Cs}_4\text{PbBr}_6$  NCs, (g-i) N 1s, C 1s and Br of  $\text{R-Cs}_4\text{PbBr}_6$  NCs.

## 19. NMR spectra

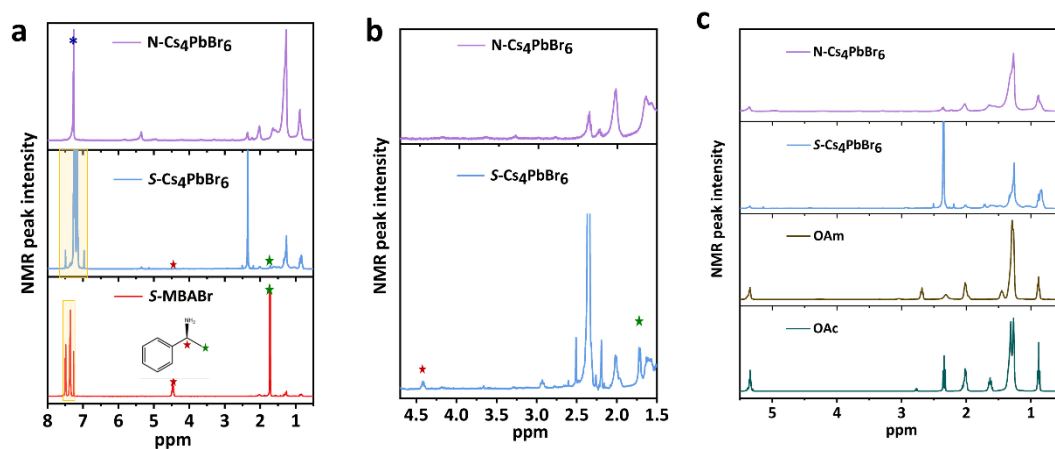

**Fig. S22.**  $^1\text{H}$  NMR spectra of (a) N-Cs<sub>4</sub>PbBr<sub>6</sub> NCs, S-Cs<sub>4</sub>PbBr<sub>6</sub> NCs and S-MBABr in chloroform-d (CDCl<sub>3</sub>). The blue asterisks refer to the solvent signal, the orange region is the chemical shift of  $^1\text{H}$  on the benzene ring. (b) The regional magnification of  $^1\text{H}$  NMR spectrum of N-Cs<sub>4</sub>PbBr<sub>6</sub> NCs and S-Cs<sub>4</sub>PbBr<sub>6</sub> NCs. (c)  $^1\text{H}$  NMR spectrum of N-Cs<sub>4</sub>PbBr<sub>6</sub> NCs, S-Cs<sub>4</sub>PbBr<sub>6</sub> NCs, OAm and OAc at chemical shifts of 5.5-0.5 ppm.

## 20. TRPL Data

**Table S1.** TRPL results for *R*-, *S*-Cs<sub>4</sub>PbBr<sub>6</sub> NCs.

| Sample                                      | $\tau_1$ (ns) | $A_1$  | $\tau_2$ (ns) | $A_2$   | $\tau_3$ (ns) | $A_3$   | $\tau_{ave}$ (ns) |
|---------------------------------------------|---------------|--------|---------------|---------|---------------|---------|-------------------|
| <i>S</i> -Cs <sub>4</sub> PbBr <sub>6</sub> | 0.9223        | 6.03 % | 9.302         | 19.21 % | 52.36         | 72.76 % | 50.36             |
| <i>R</i> -Cs <sub>4</sub> PbBr <sub>6</sub> | 0.8654        | 7.91%  | 8.027         | 22.90%  | 44.24         | 69.20%  | 42.10             |

The films were fitted with a triexponential function of the form:

$$A(t) = A_1 \exp(-t/\tau_1) + A_2 \exp(-t/\tau_2) + A_3 \exp(-t/\tau_3) \quad (3)$$

$$\tau_{ave} = (A_1 \tau_1^2 + A_2 \tau_2^2 + A_3 \tau_3^2) / (A_1 \tau_1 + A_2 \tau_2 + A_3 \tau_3) \quad (4)$$

Where,  $\tau_1$ ,  $\tau_2$  and  $\tau_3$  present the decay time,  $A_1$ ,  $A_2$  and  $A_3$  present the relative contributions, respectively.

## 21. The absorption dissymmetry factor ( $g_{\text{abs}}$ )

**Table S2.** The  $g_{\text{abs}}$ -factor values ( $\times 10^{-3}$ ) of chiral *R*-, *S*- $\text{Cs}_4\text{PbBr}_6$  NCs treated with different content of chiral solution.

| Sample                                | 250  | 400  | 500 | 600  | 700 |
|---------------------------------------|------|------|-----|------|-----|
| <i>S</i> - $\text{Cs}_4\text{PbBr}_6$ | -1.2 | -4.5 | -5  | -8.8 | -2  |
| <i>R</i> - $\text{Cs}_4\text{PbBr}_6$ | 3    | 4.5  | 7.4 | 8.5  | 3.3 |
